# Supplementary material
Source: PubMed Central journal article supplement (PMC2287348)
Supplement: plntphys_pp.108.117044_1.pdf [file plntphys_pp.108.117044_1.pdf]

Supplemental data online

Control of compound leaf development by *FLO/LFY* ortholog *Single Leaflet1* in *Medicago truncatula*

Hongliang Wang<sup>§</sup>, Jianghua Chen<sup>§</sup>, Jiangqi Wen, Million Tadege, Guangmin Li, Yu Liu, Kirankumar S. Mysore, Pascal Ratet<sup>†</sup> and Rujin Chen\* (Plant Biology Division, Samuel Roberts Noble Foundation, 2510 Sam Noble Parkway, Ardmore, Oklahoma 73401; <sup>†</sup>Institut des Sciences du Vegetale, CNRS, Avenue de la Terrasse, 91198, Gif sur Yvette, France); <sup>§</sup>these authors contributed equally to the work; \*author for correspondence, rchen@noble.org

SGL1 MDPDAFTASLFWKWP.RTVLPTAPPLRPQLLDYAVTPSTAP.....SPYYPAR  
UNI MDPDAFTASLFWKWP.RTVLSTAPSPRPQLLDYAVTPTTAP.....MTYHPAR  
PFM MDPDAFTASLFWKWP.RTVLPTTGPLRPQLLDYAVAPPAPA.....AVYHPAR  
FA MDPDAFSASLFWKWP.RGAMPPP...SRLLEPVAPPQPPPSLPPPPPPQLPTSSYSIR  
ALF MDPEAFSASLFWKWP.RGAMPPP...NRLLEAVAPPQPPP..PPLPPPQLPP.AYSIR  
NFL MDPEAFSASLFWKWP.RGAMPPP...TRLLEAAVAPPPPP..PVLPPPQLSA.AYSIR  
FLO MDPDAF...LFWKWDH.RTALPQP...NRLLDVAVAPPPPP..PQAP.....SYSMR  
Imp-FLO MDPEAFSASLFWKWP.RGPIAPP...TNRLLEAAAAAAPPHP.....AAMMSYSGR  
LFY MDPEGFTSGLFRWNPTRALVQAPPVPPPLQQQPVTPQTAA.....FGMR

SGL1 L.PRELGGLEELFQAYGIRYYTAAKIAELGFTVSTLVDMKDEELDDMMNSLSQIFRWDL  
UNI L.PRELGGLEELFQAYGIRYYTAAKIAELGFTVSTLVDMKDEELDDMMNSLSQIFRWDL  
PFM A.PREIGGLEELFQAYGIRYYTAAKIAELGFTVSTLVDMKDEELDDMMNSLSQIFRWDL  
FA S.TRELGGLEELFQAYGIRYYTAAKIAELGFTVNTLLDMKDEELDDMMNSLSQIFRWDL  
ALF ..TRELGGLEEMFQAYGIRYYTAAKITELGFTVNTLLDMKDEELDDMMNSLSQIFRWELL  
NFL ..TRELGGLEELFQAYGIRYYTAAKIAELGFTVNTLLDMKDEELDDMMNSLSQIFRWELL  
FLO ..PRELGGLEELFQAYGIRYYTAAKIAELGFTVNTLLDMRDEELDEMNSLQCIFRWDL  
Imp-FLO PHQRDLGGLEDLFQAYGIRYYTAAKISELGFTVSTLIDMKDEELDDMMNSLSHLFRWELL  
LFY .....LGGLEGLFGPYGIRFYTAAKIAELGFTASTLVGMKDEELEEMNSLSHIFRWELL

SGL1 VGERYGKAAIRAERRRLDEE...EIKRRGLLSG.....DTT.NALDALSQE.....GL  
UNI VGERYGKAAIRAERRRLDEE...EIKRRGLLSG.....DTT.NALDALSQE.....GL  
PFM VGERYGKAAVRAERRRLDEE...DMKRRNLLST.....DTTINALDALSQEGVNKFVGL  
FA VGERYGKAAIRAERWRLEEE...EARRRGHILS.....DGGTNVLDALSQE.....GL  
ALF VGERYGKAAIRAERRRLEEE...EGRRR.HILS.....DGGTNVLDALSQE.....GL  
NFL VGERYGKAAIRAERRRLEEE...ELRRRSHLLS.....DGGTNALDALSQE.....GL  
FLO VGERYGKAAVRAERRRIDE...EVRRR.HLLL.....GDTTHALDALSQE.....GL  
Imp-FLO VGERYGKAAVRAEQRRR.....HLIYASEQQQ.....QPSINALDALSQE.....GL  
LFY VGERYGKAAVRAERRRLQEEEEESSRRRHLLLSAAGDSGTHHALDALSQE.....GL

SGL1 SEEPVVQR.EKEAVGSGGGST...WEVAVVEERRKRQQIRRRR.....MKMKGNG...DH  
UNI SEEPVVQR.EKEAMGSGGGST...WEVAVVEERRKRQQIRRRR.....MKMKGN...DH  
PFM SEEPVVQR.EKEVVGSGGGST...WEVAVVAEERRKKQRRRSR.....MKQHGD...NEE  
FA SEEPVQQHEREAAGSGGGGT...WEVAAG.GGGRMKQRRRKK...AGRERRG...EED  
ALF SEEPVQQQ.EREAGSGGGGTA...WEVAVP.GGGRMRQRRRKKVV.VGRERRGSS.MEED

|         |                                                                |
|---------|----------------------------------------------------------------|
| NFL     | SEEPVQQQ.EREAVGSGGGGTT..WEVVAAVGGGRMKQRRRKKVSTGRERRGRASAEED    |
| FLO     | SEEPVQQE..KEAMGSGGGVGGVWEMMGA.GGRKAPQRRRKNYK..GRSRMAS..MEED    |
| Imp-FLO | SEE.....KEAAGSGGVGSAG.WEMTAVVAGAIIGNTRDRRR.....RSRKGNSCDEER    |
| LFY     | SEEPVQQDQTDAAAGNNGGGGGSGYWDAGQGKMKKQQQRRRKK.....PMLTS..VETD    |
|         |                                                                |
| SGL1    | GENEEGDEE..EEDNISGG...GERQREHPFIVTEPGEVARGKKNGLDYLFHLYEQCRE    |
| UNI     | GENEEGEEE..EEDNISGGGVGGGERQREHPFIVTEPAEVARGKKNGLDYLFHLYEQCRE   |
| PFM     | GEDEEGEDD..DEGNNSGGGGGCERQREHPFIVTEPGEVARGKKNGLDYLFHLYEQCRE    |
| FA      | EETEELGEEDEENMNQGGGGGGSERQREHPFIVTEPGEVARGKKNGLDYLFHLYEQCRD    |
| ALF     | EDTEEGQEDNEDYNINNEGGGGISERQREHPFIVTEPGEVARGKKNGLDYLFHLYEQCRD   |
| NFL     | EETEEGQED..EWNIN.DAGGGISERQREHPFIVTEPGEVARGKKNGLDYLFHLYEQCRD   |
| FLO     | DDDDDDDETEGAEDDEN.....IVSERQREHPFIVTEPGEVARGKKNGLDYLFHLYEQCRD  |
| Imp-FLO | GSDGEGGGD.....ERQREHPFIVTEPGEVARGKKNGLDYLFHLYEQCRE             |
| LFY     | EDVNEGEDDD.GMDNGNGGSGLGTERRQREHPFIVTEPGEVARGKKNGLDYLFHLYEQCRE  |
|         |                                                                |
| SGL1    | FLIQVQAIAKERGEKCPKVTNQVFRYAKKAGASYINKPKMRHYVHCYALHCLDDEEVSNE   |
| UNI     | FLIQVQAIAKERGEKCPKVTNQVFRYAKKAGASYINKPKMRHYVHCYALHCLDDEEVSNE   |
| PFM     | FLIQVQAIADRGEKCPKVTNQVFRYAKKAGASYINKPKMRHYVHCYALHCLDDEEVSNE    |
| FA      | FLIQVQTIAKERGEKCPKVTNQVFRYAKKAGASYINKPKMRHYVHCYALHCLDEDASNA    |
| ALF     | FLIQVQNIAKERGEKCPKVTNQVFRFAKKAGASYINKPKMRHYVHCYALHCLDEDASNA    |
| NFL     | FLIQVQNIAKERGEKCPKVTNQVFRYAKKAGASYINKPKMRHYVHCYALHCLDDEEASNA   |
| FLO     | FLIQVQTIAKERGEKCPKVTNQVFRYAKKAGANYINKPKMRHYVHCYALHCLDDEEASNA   |
| Imp-FLO | FLIQVQNIAKERGEKCPKVTNQVFRYAKKAGASYINKPKMRHYVHCYALHCLDDEEASNA   |
| LFY     | FLLQVQTIADRGEKCPKVTNQVFRYAKKSGASYINKPKMRHYVHCYALHCLDDEEASNA    |
|         |                                                                |
| SGL1    | LRRGFKERGENVGAWRQACYKPLVAIAARQGWIDIDAI FNAHPRLSIWYVPTKLRQLCHAE |
| UNI     | LRRGFKERGENVGAWRQACYKPLVAIAARQGWIDIDAI FNAHPRLSIWYGPTKLRQLCHAE |
| PFM     | LRRGFKERGENVGAWRQACYKPLVAIAARQGWIDIDAI FNAHPRLSIWYVPTKLRQLCHAE |
| FA      | LRRAFKERGENVGAWRQACYKPLVAIAARQGWIDIDAI FNAHPRLAIWYVPTKLRQLCHSE |
| ALF     | LRRAFKERGENVGAWRQACYKPLVAIAARQGWIDIDAI FNGHPRLSIWYVPTKLRQLCHSE |
| NFL     | LRRAFKERGENVGAWRQACYKPLVAIAARQGWIDITIFNAHPRLAIWYVPTLRQLCHSE    |
| FLO     | LRRAFKERGENVGAWRQACYKPLVAIAARQGWIDITIFNAHPRLSIWYVPTKLRQLCHAE   |
| Imp-FLO | LRRAFKERGENVGAWRQACYRPLVNVAARREWDIDAVFN SHPRLSVWYVPTKLRQLCHAE  |
| LFY     | LRRAFKERGENVGSWRQACYKPLVNIACRHGWDIDAVFN AHPRLSIWYVPTKLRQLCHLE  |
|         |                                                                |
| SGL1    | RN..SAAASSSVS.....VGT..AHLPF.                                  |
| UNI     | RN..GAAASSSVS.....FGT..THLPF.                                  |
| PFM     | RN..SAAASSSVS.....VGT..AHLPF.                                  |
| FA      | RSNAAAAASSSVS.....GGV.ADHLPHF                                  |
| ALF     | RSNAAAAASTSVS.....GGG.VDHLPHF                                  |
| NFL     | RSNAAAAASSSVS.....GGV.GDHLPHF                                  |
| FLO     | RSSAAVAATSSIT.....GGGPADHLPF.                                  |
| Imp-FLO | RSSSVSAGAASSS.....GGT..VLMPF.                                  |
| LFY     | RNNAVAAAAALVGGISCTGSSTSGRGGCGDDLRF.                            |

Supplemental Figure 1 Amino acid sequence alignment of SGL1 and its orthologs.

**Supplemental Table 1** Genetic segregation analysis of *sgll-1* mutant suggests that *sgll-1* segregates as a single recessive locus.

|                                         | <b>Wild-type-like</b> | <i>sgll-1</i> | <b>Wild-type-like : mutant</b> |
|-----------------------------------------|-----------------------|---------------|--------------------------------|
| <i>sgll-1</i> (+/-) self<br>pollination | 105                   | 34            | 3:1                            |

**Supplemental Table 2** Distribution of floral organ number in homozygous *lfy* transgenic plants compared with wild-type *Col-0* plants.

| Transgenic line                      | Floral organ | Floral organ number |    |    |    |     |    |    |
|--------------------------------------|--------------|---------------------|----|----|----|-----|----|----|
|                                      |              | 0                   | 1  | 2  | 3  | 4   | 5  | 6  |
| <i>LFY:LFY</i><br>(n=56)             | Sepal        | 0                   | 0  | 0  | 0  | 56  | 0  | 0  |
|                                      | Petal        | 0                   | 1  | 2  | 0  | 51  | 2  | 0  |
|                                      | Stamen       | 0                   | 0  | 0  | 0  | 1   | 21 | 34 |
| <i>LFY:SGL1</i><br>(n=305)           | Sepal        | 0                   | 0  | 0  | 1  | 300 | 4  | 0  |
|                                      | Petal        | 0                   | 5  | 30 | 72 | 186 | 7  | 5  |
|                                      | Stamen       | 4                   | 14 | 37 | 56 | 116 | 66 | 12 |
| <i>SGL1:SGL1</i><br>(n=117)          | Sepal        | 0                   | 0  | 0  | 0  | 117 | 0  | 0  |
|                                      | Petal        | 1                   | 1  | 9  | 7  | 93  | 5  | 1  |
|                                      | Stamen       | 0                   | 0  | 3  | 13 | 22  | 28 | 51 |
| Wild-type ( <i>Col-0</i> )<br>(n=60) | Sepal        | 0                   | 0  | 0  | 0  | 60  | 0  | 0  |
|                                      | Petal        | 0                   | 0  | 0  | 0  | 60  | 0  | 0  |
|                                      | Stamen       | 0                   | 0  | 0  | 0  | 0   | 1  | 59 |
